# Supplementary material
Source: PubMed Central journal article supplement (PMC6989954)
Supplement: BPH-177-267-s001.pdf [file BPH-177-267-s001.pdf]

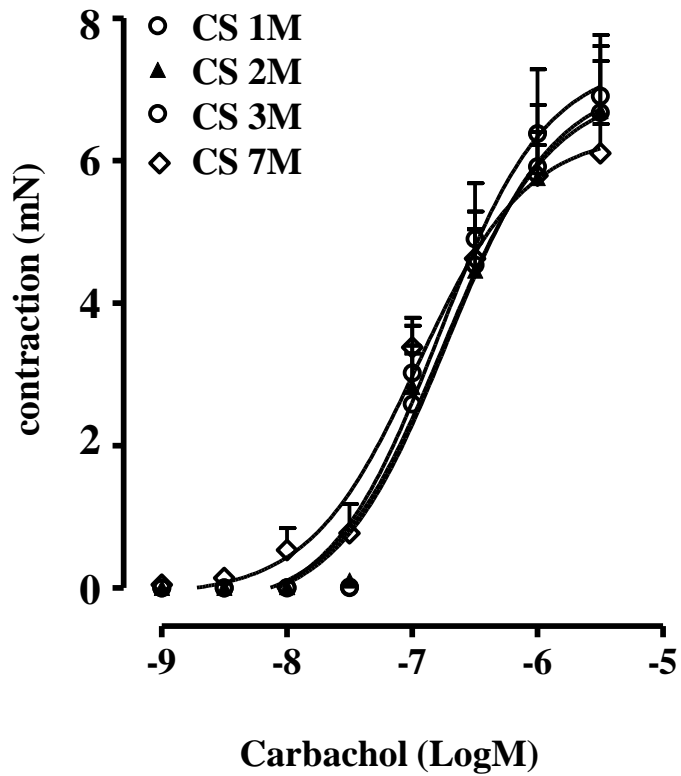

**Supplemental Figure 1** Cigarette smoke (CS) effect on bronchial reactivity. Mice were exposed to cigarette smoke for 1,2, 3 and 7months and bronchial reactivity to carbachol was evaluated *in vitro*.
